# Supplementary material for: Simultaneous manipulation of iron(ii) spin crossover and LIESST behaviour using pressure, temperature and light
Source: Royal Society of Chemistry journal article supplement (doi:10.1039/d4dt00509k), 2024-01-01
Supplement: d4dt00509k1.pdf [file d4dt00509k1.pdf]

## Electronic Supplementary Information

### Simultaneous manipulation of iron(II) spin crossover and LIESST behaviour by pressure, temperature and light

Gabriela Handzlik,<sup>a\*</sup> Kamil F. Dziubek,<sup>b</sup> Michael Hanfland,<sup>c</sup> and Dawid Pinkowicz<sup>a\*</sup>

<sup>a</sup> Faculty of Chemistry, Jagiellonian University, Gronostajowa 2, 30-387 Kraków, Poland

<sup>b</sup> Institut für Mineralogie und Kristallographie, Universität Wien, Josef-Holaubek-Platz 2, A-1090 Wien, Austria

<sup>c</sup> European Synchrotron Radiation Facility, 71 Avenue des Martyrs, CS40220, 38043, Grenoble, Cedex 9, France

#### Table of contents:

High pressure scXRD experimental setup description

High-pressure experiments at 100 K

**Table S1.** Crystal structure solution and refinement parameters for **FeNb** under high pressure (HP) at 100 K.

**Table S2.** The Fe-N bond lengths under HP at 100 K.

Irradiation experiment at 0.28(2) GPa, 5K

**Table S3.** Crystal structure solution and refinement parameters for **FeNb** in an irradiation experiment at 0.28(2) GPa (steps 1-3).

Irradiation experiment at 0.82(1) GPa, 5K

**Table S4.** Crystal structure solution and refinement parameters for **FeNb** in an irradiation experiment at 0.82(1) GPa (steps 4-5).

Irradiation experiment at 0.87(1) GPa, 5K

**Table S5.** Crystal structure solution and refinement parameters for **FeNb** in an irradiation experiment at 0.87(1) GPa (steps 6-9).

**Figure S1.** Asymmetric unit of the crystal structure before irradiation (blue; step 6) and after irradiation (yellow; step 7). 10% or 50% probability level for ellipsoids.

**Figure S2.** Packing of the crystal structure before irradiation (blue; step 6) and after irradiation (yellow; step 7). 10% or 50% probability level for ellipsoids.

**Figure S3.** Asymmetric unit of the crystal structure after irradiation (yellow; step 7) and after thermal relaxation (red; step 9). 10% or 50% probability level for ellipsoids.

**Figure S4.** Packing of the crystal structure after irradiation (yellow; step 7) and after thermal relaxation (red; step 9). 10% or 50% probability level for ellipsoids.

**Figure S5.** Comparison of the Fe-N bond contraction in **FeNb** under high pressure at 100 K reported in this work (pink points) with the  $\text{Fe}^{\text{II}}_{\text{HS}}$  molar fraction calculated from the magnetic data at low temperature around 100 K reported in Figure S5 of the ref. 37.

**Table S6.** Selected bond lengths and angles for **FeNb** in nine consecutive diffraction experiment (steps in Figure 4) at three different pressures before and after light irradiation, with the crystallographic data collected at 5 K.

#### High pressure scXRD experimental setup description

The experiments were performed at the high-pressure beamline ID15B of the European Synchrotron Radiation Facility (ESRF). The high intensity of the X-ray synchrotron beam allows rapid data collection with relatively high completeness compared to commercial diffractometers equipped with Merrill-Bassett diamond anvil cells (DACs).

A single crystal of **FeNb** (approx. 0.10 x 0.10 x 0.03 mm) was loaded into a membrane-type DAC filled with helium gas as a pressure transmitting medium. The pressure of the membrane was controlled using GE Druck Pace5000 pressure controller and was determined by an in-situ ruby fluorescence measurement before and after each X-ray diffraction experiment. The ruby photoexcitation was performed inside the DAC at the measurement conditions in between the diffraction experiments using 488 nm laser diode. A liquid helium cooled cryostat suitable for X-ray diffraction was used to perform low temperature measurements down to 5 K.

All X-ray diffraction experiments described in this paper were carried out on a high quality single crystal of **FeNb**. Due to the technical limitations in controlling the pressure during the decompression of the DAC, it was necessary to combine as many experiments as possible in a single run. In addition, it was necessary to make all pressure changes at a temperature of at least 70 K due to the membrane-type diamond-anvil cell characteristics. Further small pressure changes inside the cell during the experiments were caused by changing the temperature. First, the diamond-anvil cell containing **FeNb** crystal was filled with helium gas to reach a pressure of 0.58 GPa at 200 K. The cell was then gradually cooled and X-ray diffraction experiments were carried out during cooling. At the same time, the pressure was gradually reduced.

Details of the successive single-crystal X-ray diffraction measurements and refinements and the CCDC numbers assigned to the exact crystal structures are given in Tables S1-S4. Data reduction, scaling and absorption corrections (spherical harmonics) were performed using Agilent CrysAlisPro software. Structures were determined using OLEX2 (ShelXT).<sup>1-3</sup> All non-hydrogen atoms were refined anisotropically. Hydrogen atoms were treated by a mixture of independent and constrained refinement. All structural models for the single **FeNb** crystal under different conditions are deposited in the CSD database. The source data are available using the ESRF DOI portal at <https://data.esrf.fr/doi/>.<sup>4</sup>

### High-pressure experiments at 100 K

**Table S1.** Crystal structure solution and refinement parameters for **FeNb** under high pressure (HP) at 100 K.

| <b>p (GPa)</b>                                          | <b>0.08(1)</b>                                                   | <b>0.37(1)</b>                  | <b>0.38(1)</b>                   | <b>0.51(1)</b>                  |
|---------------------------------------------------------|------------------------------------------------------------------|---------------------------------|----------------------------------|---------------------------------|
| <b>CCDC</b>                                             | <b>2326694</b>                                                   | <b>2326495</b>                  | <b>2326697</b>                   | <b>2326507</b>                  |
| Radiation                                               | Synchrotron radiation, $\lambda = 0.41008 \text{ \AA}$           |                                 |                                  |                                 |
| Temperature                                             | 100 K                                                            |                                 |                                  |                                 |
| Formula                                                 | $\text{C}_{32}\text{H}_{40}\text{Fe}_2\text{N}_{24}\text{NbO}_4$ |                                 |                                  |                                 |
| Formula weight<br>g/mol                                 | 1029.49                                                          |                                 |                                  |                                 |
| Space group                                             | $I4_1/a$                                                         |                                 |                                  |                                 |
| Unit cell / $\text{\AA}$                                | a = 21.6050(4)<br>c = 9.5533(18)                                 | a = 21.4750(3)<br>c = 9.4576(7) | a = 21.4558(4)<br>c = 9.4642(13) | a = 21.4180(3)<br>c = 9.4229(8) |
| Volume / $\text{\AA}^3$                                 | 4459.3(9)                                                        | 4361.6(3)                       | 4356.9(6)                        | 4322.6(4)                       |
| Z                                                       | 4                                                                |                                 |                                  |                                 |
| Density / $\text{g cm}^{-3}$                            | 1.533                                                            | 1.568                           | 1.569                            | 1.582                           |
| $F(000)$                                                | 2100                                                             |                                 |                                  |                                 |
| Abs. coeff. / $\text{mm}^{-1}$                          | 0.532                                                            | 0.544                           | 0.544                            | 0.548                           |
| Independent reflections                                 | 1481                                                             | 2053                            | 1840                             | 2028                            |
| Parameters                                              | 152                                                              | 147                             | 152                              | 152                             |
| Restraints                                              | 3                                                                | 3                               | 3                                | 3                               |
| $R_1 [F_o > 4\sigma(F_o)] / \%$                         | 4.01                                                             | 3.8                             | 4.35                             | 3.46                            |
| $wR_2 [\text{all}] / \%$                                | 9.60                                                             | 9.56                            | 11.23                            | 9.17                            |
| $I/s / \%$                                              | 13.7                                                             | 14.9                            | 12.5                             | 16.2                            |
| GOF on $F^2$ [all refl.]                                | 0.999                                                            | 1.081                           | 1.030                            | 1.065                           |
| Max/min resid.<br>density / $\text{e}\cdot\text{\AA}^3$ | 0.38, -0.35                                                      | 0.45, -0.38                     | 0.49, -0.26                      | 0.30, -0.24                     |
| Collected reflections                                   | 2238                                                             | 4490                            | 4054                             | 4459                            |
| $R_{\text{int}} / \%$                                   | 4.37                                                             | 5.18                            | 5.17                             | 5.07                            |
| Completeness / %                                        | 48.6                                                             | 65.9                            | 59.2                             | 66.0                            |

**Table S1.** (continued)

| <b><i>p</i> (GPa)</b>                        | <b>0.83(1)</b>                                                   | <b>1.25(1)</b>                   | <b>1.36(1)</b>                   | <b>1.53(1)</b>                  |
|----------------------------------------------|------------------------------------------------------------------|----------------------------------|----------------------------------|---------------------------------|
| <b>CCDC</b>                                  | <b>2327450</b>                                                   | <b>2326556</b>                   | <b>2327431</b>                   | <b>2327700</b>                  |
| Radiation                                    | Synchrotron radiation, $\lambda = 0.41008 \text{ \AA}$           |                                  |                                  |                                 |
| Temperature                                  | 100 K                                                            |                                  |                                  |                                 |
| Formula                                      | $\text{C}_{32}\text{H}_{40}\text{Fe}_2\text{N}_{24}\text{NbO}_4$ |                                  |                                  |                                 |
| Formula weight<br>g/mol                      | 1029.49                                                          |                                  |                                  |                                 |
| Space group                                  | $I4_1/a$                                                         |                                  |                                  |                                 |
| Unit cell / $\text{\AA}$                     | a = 21.1151(5)<br>c = 9.3661(17)                                 | a = 20.7576(7)<br>c = 9.3174(17) | a = 20.7181(6)<br>c = 9.3075(13) | a = 20.6618(4)<br>c = 9.2789(9) |
| Volume / $\text{\AA}^3$                      | 4175.9(8)                                                        | 4014.7(8)                        | 3995.1(6)                        | 3961.3(4)                       |
| Z                                            | 4                                                                |                                  |                                  |                                 |
| Density / $\text{g cm}^{-3}$                 | 1.638                                                            | 1.703                            | 1.712                            | 1.726                           |
| $F(000)$                                     | 2100                                                             |                                  |                                  |                                 |
| Abs. coeff. / $\text{mm}^{-1}$               | 0.568                                                            | 0.590                            | 0.593                            | 0.598                           |
| Independent reflections                      | 1737                                                             | 1788                             | 1889                             | 1743                            |
| Parameters                                   | 151                                                              | 152                              | 151                              | 152                             |
| Restraints                                   | 4                                                                | 3                                | 10                               | 93                              |
| $R_1 [F_o > 4\sigma(F_o)] / \%$              | 5.43                                                             | 4.54                             | 7.42                             | 9.59                            |
| $wR_2 [\text{all}] / \%$                     | 14.73                                                            | 10.83                            | 21.62                            | 32.70                           |
| $I/s / \%$                                   | 13.9                                                             | 11.9                             | 5.7                              | 3.2                             |
| GOF on $F^2$ [all refl.]                     | 1.058                                                            | 0.949                            | 1.025                            | 1.049                           |
| Max/min resid.<br>density / $\text{e-\AA}^3$ | 0.34, -0.28                                                      | 0.46, -0.32                      | 1.07, -0.45                      | 1.39, -0.74                     |
| Collected reflections                        | 3895                                                             | 3719                             | 3742                             | 3321                            |
| $R_{\text{int}} / \%$                        | 5.13                                                             | 5.53                             | 7.99                             | 10.89                           |
| Completeness / %                             | 58.9                                                             | 64.2                             | 67.2                             | 61.0                            |

**Table S2.** The Fe-N bond lengths under HP at 100 K.

| Pressure (GPa) | Fe-N <sub>CN</sub> ( $\text{\AA}$ )<br>(Fe1-N2) | Fe-N <sub>pyr1</sub> ( $\text{\AA}$ )<br>(Fe1-N3) | Fe-N <sub>pyr2</sub> ( $\text{\AA}$ )<br>(Fe1-N5) |
|----------------|-------------------------------------------------|---------------------------------------------------|---------------------------------------------------|
| 0.08           | 2.183(3)                                        | 2.172(5)                                          | 2.156(4)                                          |
| 0.37           | 2.169(2)                                        | 2.167(3)                                          | 2.150(2)                                          |
| 0.38           | 2.166(3)                                        | 2.158(5)                                          | 2.149(3)                                          |
| 0.51           | 2.159(2)                                        | 2.171(3)                                          | 2.144(2)                                          |
| 0.83           | 2.082(4)                                        | 2.090(8)                                          | 2.075(5)                                          |
| 1.25           | 1.976(3)                                        | 2.014(5)                                          | 1.993(3)                                          |
| 1.36           | 1.965(5)                                        | 2.003(8)                                          | 1.990(6)                                          |
| 1.53           | 1.954(5)                                        | 1.992(9)                                          | 1.978(7)                                          |

Irradiation experiment at 0.28(2) GPa, 5K

**Table S3.** Crystal structure solution and refinement parameters for **FeNb** in an irradiation experiment at 5 K and 0.28(2) GPa (steps 1-3).

| Step no. in Figure 4                               | 1                                                                | 2                                      | 3                                       |
|----------------------------------------------------|------------------------------------------------------------------|----------------------------------------|-----------------------------------------|
| $\rho$ (GPa)                                       | 0.28(2)                                                          | 0.28(2)                                | 0.28(2)                                 |
| $T$ (K)                                            | 5                                                                | 5                                      | 5                                       |
| Details                                            | before irradiation                                               | After 65 min of blue light irradiation | After 105 min of blue light irradiation |
| CCDC                                               | <b>2326497</b>                                                   | <b>2326501</b>                         | <b>2326517</b>                          |
| Radiation                                          | Synchrotron radiation, $\lambda = 0.41008 \text{ \AA}$           |                                        |                                         |
| Formula                                            | $\text{C}_{32}\text{H}_{40}\text{Fe}_2\text{N}_{24}\text{NbO}_4$ |                                        |                                         |
| Formula weight g/mol                               | 1029.49                                                          |                                        |                                         |
| Space group                                        | $I4_1/a$                                                         |                                        |                                         |
| Unit cell / $\text{Å}$                             | a = 21.4595(4)<br>c = 9.4491(10)                                 | a = 21.4722(3)<br>c = 9.4522(8)        | a = 21.4699(3)<br>c = 9.4581(7)         |
| Volume / $\text{Å}^3$                              | 4351.4(5)                                                        | 4358.0(4)                              | 4359.8(3)                               |
| Z                                                  | 4                                                                |                                        |                                         |
| Density / $\text{g cm}^{-3}$                       | 1.571                                                            | 1.569                                  | 1.568                                   |
| $F(000)$                                           | 2100                                                             |                                        |                                         |
| Abs. coeff. / $\text{mm}^{-1}$                     | 0.545                                                            | 0.544                                  | 0.544                                   |
| Independent reflections                            | 2028                                                             | 2039                                   | 2033                                    |
| Parameters                                         | 152                                                              | 152                                    | 152                                     |
| Restraints                                         | 3                                                                | 3                                      | 3                                       |
| $R_1 [F_o > 4\sigma(F_o)] / \%$                    | 3.70                                                             | 3.51                                   | 4.08                                    |
| $wR_2 [\text{all}] / \%$                           | 10.01                                                            | 9.30                                   | 10.78                                   |
| $I/s / \%$                                         | 15.0                                                             | 16.2                                   | 15.2                                    |
| GOF on $F^2$ [all refl.]                           | 1.060                                                            | 1.048                                  | 1.058                                   |
| Max/min resid. density / $\text{e}\cdot\text{Å}^3$ | 0.41, -0.33                                                      | 0.36, -0.33                            | 0.53, -0.43                             |
| Collected reflections                              | 4496                                                             | 4513                                   | 4499                                    |
| $R_{\text{int}} / \%$                              | 5.01                                                             | 4.62                                   | 4.82                                    |
| Completeness / %                                   | 65.6                                                             | 66.0                                   | 65.9                                    |

Irradiation experiment at 0.82(1) GPa, 5K

**Table S4.** Crystal structure solution and refinement parameters for **FeNb** in an irradiation experiment at 5 K and 0.82(1) GPa (steps 4-5).

| Step no. in Figure 4                         | 4                                                                | 5                                      |
|----------------------------------------------|------------------------------------------------------------------|----------------------------------------|
| $p$ (GPa)                                    | 0.82(1)                                                          | 0.82(1)                                |
| $T$ (K)                                      | 5                                                                | 5                                      |
| Details                                      | before irradiation                                               | After 50 min of blue light irradiation |
| <b>CCDC</b>                                  | <b>2327702</b>                                                   | <b>2326557</b>                         |
| Radiation                                    | Synchrotron radiation, $\lambda = 0.41008 \text{ \AA}$           |                                        |
| Formula                                      | $\text{C}_{32}\text{H}_{40}\text{Fe}_2\text{N}_{24}\text{NbO}_4$ |                                        |
| Formula weight<br>g/mol                      | 1029.49                                                          |                                        |
| Space group                                  | $I4_1/a$                                                         |                                        |
| Unit cell / $\text{\AA}$                     | a = 21.091(1)<br>c = 9.379(2)                                    | a = 21.1680(7)<br>c = 9.3545(17)       |
| Volume / $\text{\AA}^3$                      | 4171.8(11)                                                       | 4191.6(8)                              |
| Z                                            | 4                                                                |                                        |
| Density / $\text{g cm}^{-3}$                 | 1.639                                                            | 1.631                                  |
| $F(000)$                                     | 2100                                                             |                                        |
| Abs. coeff. / $\text{mm}^{-1}$               | 0.568                                                            | 0.566                                  |
| Independent reflections                      | 1782                                                             | 1832                                   |
| Parameters                                   | 152                                                              | 152                                    |
| Restraints                                   | 75                                                               | 3                                      |
| $R_1 [F_o > 4\sigma(F_o)] / \%$              | 6.55                                                             | 6.12                                   |
| $wR_2 [\text{all}] / \%$                     | 20.52                                                            | 16.57                                  |
| $I/s / \%$                                   | 7.8                                                              | 8.2                                    |
| GOF on $F^2$ [all refl.]                     | 1.011                                                            | 1.103                                  |
| Max/min resid.<br>density / $\text{e-\AA}^3$ | 0.50, -0.37                                                      | 0.66, -0.41                            |
| Collected reflections                        | 3566                                                             | 3895                                   |
| $R_{\text{int}} / \%$                        | 6.99                                                             | 6.5                                    |
| Completeness / %                             | 60.0                                                             | 62.6                                   |

Irradiation experiment at 0.87(1) GPa, 5K

**Table S5.** Crystal structure solution and refinement parameters for **FeNb** in an irradiation experiment at 5 K and 0.87(1) GPa (steps 6-9).

| Step no. in Figure 4                                 | 6                                                                | 7                                      | 8                                      | 9                                |
|------------------------------------------------------|------------------------------------------------------------------|----------------------------------------|----------------------------------------|----------------------------------|
| $p$ (GPa)                                            | 0.87(1)                                                          | 0.87(1)                                | 0.87(1)                                | 0.87(1)                          |
| $T$ (K)                                              | 5                                                                | 5                                      | 5                                      | 5                                |
| Details                                              | before irradiation                                               | after 30 min of blue light irradiation | after 50 min of blue light irradiation | after thermal relaxation at 60 K |
| <b>CCDC</b>                                          | <b>2326519</b>                                                   | <b>2326523</b>                         | <b>2326553</b>                         | <b>2327391</b>                   |
| Radiation                                            | Synchrotron radiation, $\lambda = 0.41008 \text{ \AA}$           |                                        |                                        |                                  |
| Formula                                              | $\text{C}_{32}\text{H}_{40}\text{Fe}_2\text{N}_{24}\text{NbO}_4$ |                                        |                                        |                                  |
| Formula weight<br>g/mol                              | 1029.49                                                          |                                        |                                        |                                  |
| Space group                                          | $I4_1/a$                                                         |                                        |                                        |                                  |
| Unit cell / $\text{\AA}$                             | a = 20.9186(13)<br>c = 9.372(3)                                  | a = 21.0746(7)<br>c = 9.3334(15)       | a = 21.0773(6)<br>c = 9.3291(13)       | a = 20.9206(17)<br>c = 9.371(3)  |
| Volume / $\text{\AA}^3$                              | 4101.0(13)                                                       | 4145.3(7)                              | 4144.5(6)                              | 4101.3(15)                       |
| Z                                                    | 4                                                                |                                        |                                        |                                  |
| Density / $\text{g cm}^{-3}$                         | 1.667                                                            | 1.650                                  | 1.650                                  | 1.667                            |
| $F(000)$                                             | 2100                                                             |                                        |                                        |                                  |
| Abs. coeff. / $\text{mm}^{-1}$                       | 0.578                                                            | 0.572                                  | 0.572                                  | 0.578                            |
| Independent reflections                              | 1796                                                             | 1857                                   | 1862                                   | 1864                             |
| Parameters                                           | 152                                                              | 152                                    | 152                                    | 147                              |
| Restraints                                           | 3                                                                | 3                                      | 3                                      | 3                                |
| $R_1 [F_o > 4\sigma(F_o)] / \%$                      | 4.91                                                             | 4.17                                   | 4.45                                   | 6.40                             |
| $wR_2 [\text{all}] / \%$                             | 11.31                                                            | 9.84                                   | 10.30                                  | 20.54                            |
| $I/s / \%$                                           | 10.5                                                             | 14.7                                   | 13.7                                   | 5.9                              |
| GOF on $F^2$ [all refl.]                             | 0.939                                                            | 0.961                                  | 0.970                                  | 0.943                            |
| Max/min resid. density / $\text{e}\cdot\text{\AA}^3$ | 0.61, -0.43                                                      | 0.47, -0.33                            | 0.66, -0.45                            | 0.49, -0.74                      |
| Collected reflections                                | 3764                                                             | 4011                                   | 4037                                   | 3847                             |
| $R_{\text{int}} / \%$                                | 5.92                                                             | 4.93                                   | 4.88                                   | 7.48                             |
| Completeness / %                                     | 64.1                                                             | 64.9                                   | 64.8                                   | 63.2                             |

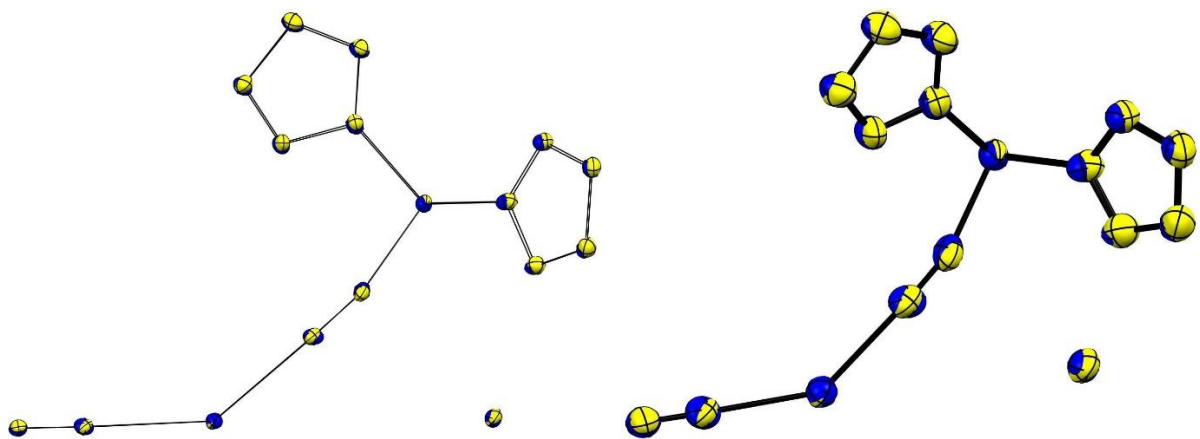

**Figure S1.** Asymmetric unit of the crystal structure before irradiation (blue; step 6) and after irradiation (yellow; step 7). 10% or 50% probability level for ellipsoids.

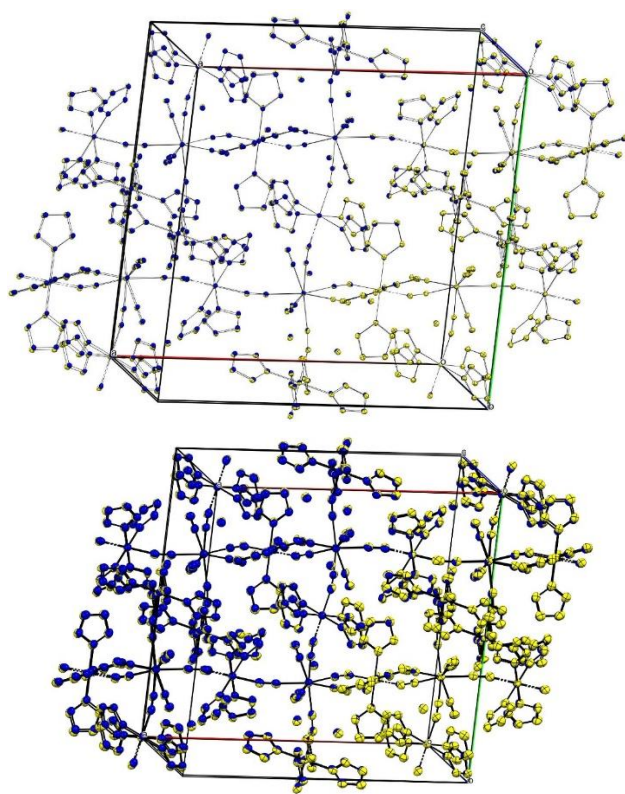

**Figure S2.** Packing of the crystal structure before irradiation (blue; step 6) and after irradiation (yellow; step 7). 10% or 50% probability level for ellipsoids.



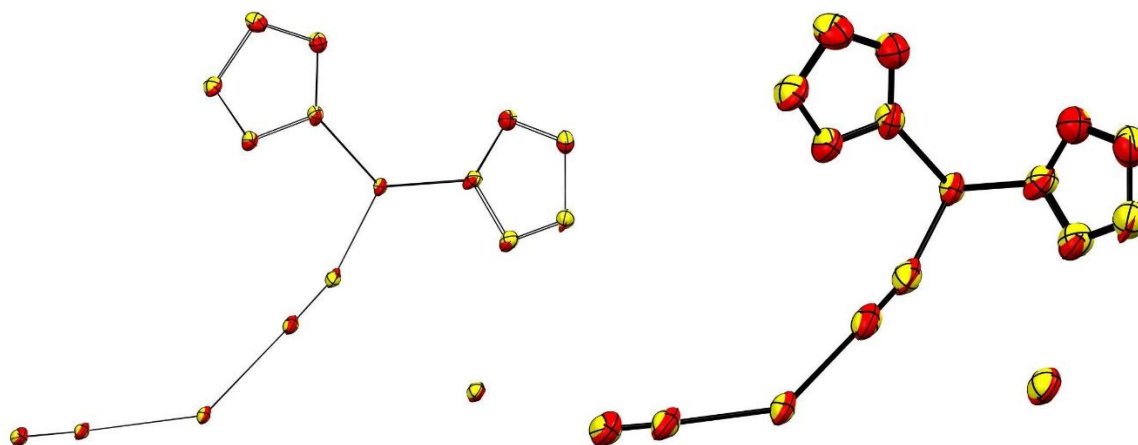

**Figure S3.** Asymmetric unit of the crystal structure after irradiation (yellow; step 7) and after thermal relaxation (red; step 9). 10% or 50% probability level for ellipsoids.

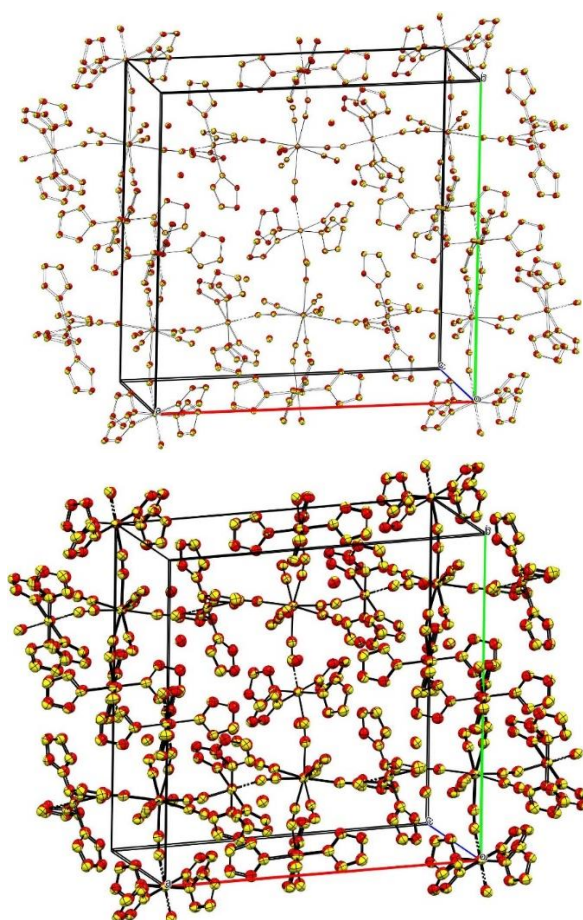

**Figure S4.** Packing of the crystal structure after irradiation (yellow; step 7) and after thermal relaxation (red; step 9). 10% or 50% probability level for ellipsoids.

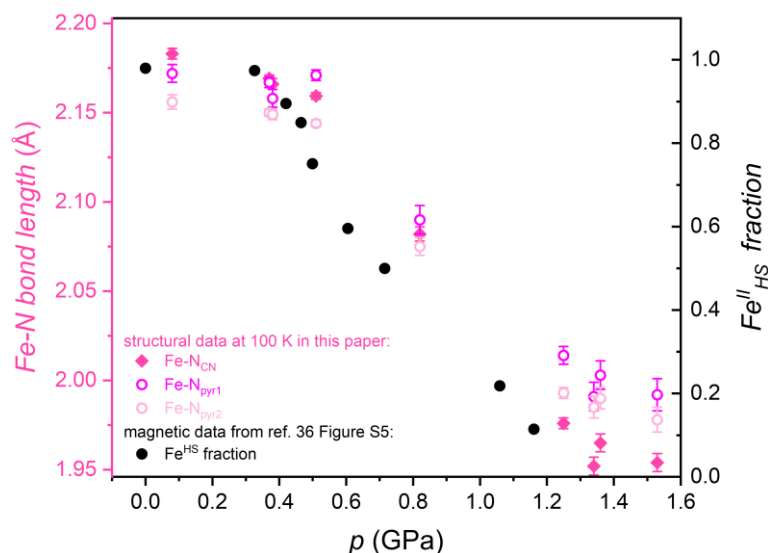

**Figure S5.** Comparison of the Fe-N bond contraction in **FeNb** under high pressure at 100 K reported in this work (pink points) with the  $\text{Fe}^{\text{II}}_{\text{HS}}$  molar fraction calculated from the magnetic data at low temperature around 100 K reported in Figure S5 of the ref. 37.

**Table S6.** Selected bond lengths and angles for **FeNb** in nine consecutive diffraction experiment (steps in Figure 4) at three different pressures before and after light irradiation, with the crystallographic data collected at 5 K.

| Step | $p$<br>(GPa) | $T$<br>(K) | Details                                      | Fe-N <sub>CN</sub> (Å) | Fe-N <sub>pyr</sub> (Å) | Fe-N <sub>pyr</sub> (Å) | Fe-N (Å) |
|------|--------------|------------|----------------------------------------------|------------------------|-------------------------|-------------------------|----------|
|      |              |            |                                              | Fe1-N2                 | Fe1-N3                  | Fe1-N5                  | average  |
| 1    | 0.28(2)      | 5          | Before irradiation                           | 2.163(2)               | 2.166(3)                | 2.149(2)                | 2.16(1)  |
| 2    |              |            | After 1 <sup>st</sup> irradiation for 65 min | 2.165(2)               | 2.171(4)                | 2.153(2)                | 2.16(1)  |
| 3    |              |            | After 2 <sup>nd</sup> irradiation for 40 min | 2.162(2)               | 2.172(4)                | 2.152(3)                | 2.16(1)  |
| 4    | 0.82(1)      | 5          | Before irradiation                           | 2.072(5)               | 2.106(8)                | 2.087(6)                | 2.09(2)  |
| 5    |              |            | After irradiation for 50 min                 | 2.089(4)               | 2.124(7)                | 2.101(5)                | 2.11(2)  |
| 6    | 0.87(1)      | 5          | Before irradiation                           | 2.023(4)               | 2.054(6)                | 2.038(4)                | 2.04(1)  |
| 7    |              |            | After 1 <sup>st</sup> irradiation for 30 min | 2.076(3)               | 2.106(4)                | 2.082(3)                | 2.09(1)  |
| 8    |              |            | After 2 <sup>nd</sup> irradiation for 20 min | 2.079(5)               | 2.099(5)                | 2.081(3)                | 2.09(1)  |
| 9    |              |            | After thermal relaxation at 60 K             | 2.028(5)               | 2.066(7)                | 2.041(5)                | 2.04(2)  |

#### References:

1. G. Sheldrick, *Acta Cryst. A*, 2015, **71**, 3-8.
2. G. Sheldrick, *Acta Cryst. A*, 2008, **64**, 112-122.
3. O. V. Dolomanov, L. J. Bourhis, R. J. Gildea, J. A. K. Howard and H. Puschmann, *J. Appl. Cryst.*, 2009, **42**, 339-341.
4. D. Pinkowicz, G. Handzlik, K. Dziubek and M. Magott, dataset, 2025, DOI: doi.org/10.15151/ESRF-ES-708312219.
